# Supplementary material
Source: Springer Nature journal article supplement (https://www.springermedizin.de/resource/supplementary/12879_2010_1395_MOESM1_ESM.pdf/9443158)

**A**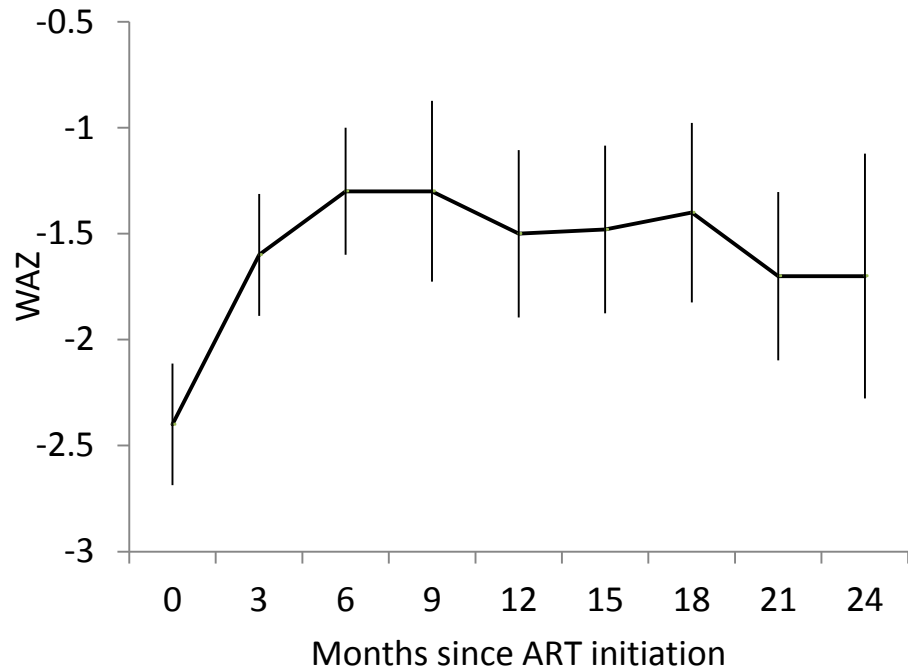**B**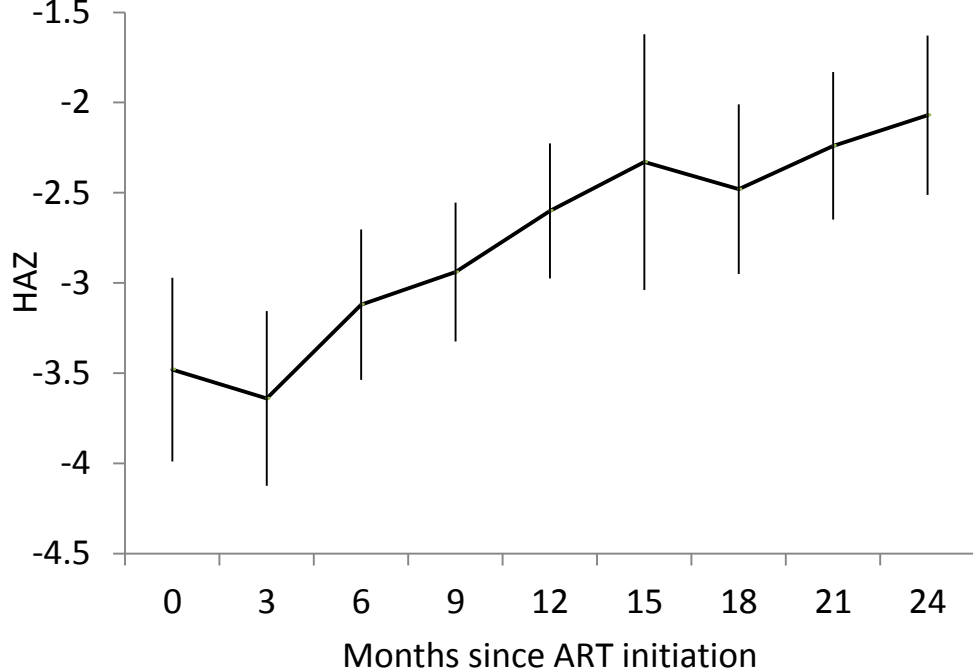

|               | 0    | 3    | 6    | 12   | 18   | 24   |
|---------------|------|------|------|------|------|------|
| N             | 119  | 88   | 73   | 51   | 34   | 20   |
| Mean          | -2.4 | -1.6 | -1.3 | -1.5 | -1.4 | -1.7 |
| Mean change * | ---  | 0.6  | 0.8  | 1.0  | 1.5  | 1.1  |
| % underweight | 59.7 | 34.1 | 28.8 | 35.3 | 26.5 | 45.0 |

|               | 0    | 3    | 6    | 12   | 18   | 24   |
|---------------|------|------|------|------|------|------|
| N             | 74   | 95   | 82   | 60   | 43   | 28   |
| Mean          | -3.5 | -3.6 | -3.1 | -2.6 | -2.5 | -2.1 |
| Mean change * | ---  | 0.4  | 1.0  | 1.3  | ---  | ---  |
| % stunted     | 71.6 | 79.0 | 80.5 | 66.7 | 60.5 | 46.4 |

Supplement: MOESM1 [file 9443158]
